# Supplementary material for: Mental Health Care Providers’ Attitudes Toward Telepsychiatry: A Systemwide, Multisite Survey During the COVID-19 Pandemic
Source: Atypon-hosted journal article supplement (doi:10.1176/appi.ps.202000441), 2021-02-17
Supplement: appi.ps.202000441.ds001.pdf [file appi.ps.202000441.ds001.pdf]

## Telepsychiatry Satisfaction Survey

The current crisis has resulted in our needing to use telehealth to continue providing treatment to our patients. We are interested in learning how you feel about this change and whether we should consider using this more in the future. Thank you for taking the time to respond to this survey.

1. Please identify the type of program for which you have provided services during the COVID-19 outbreak. (check all that apply)

- Adult Outpatient Clinic
- Adult Crisis Center
- Injection Clinic
- Geriatric Clinic
- Child and Adolescent Clinic
- Early Treatment Program
- Research
- Drug Use Treatment Program
- Partial Hospital
- Inpatient
- Other

2. Please identify your job title/role

- Psychiatrist
- Psychologist
- Nurse
- Nurse Practitioner
- LMHC
- Social Worker
- Research Coordinator
- Physician (other than psychiatrist)
- Resident
- Fellow
- Other

3. Please select your age range

- <25
- 25-34
- 35-44
- 45-54
- 55-64

65-74

>74

4. Which telehealth modalities have you used during the recent shift to remote care? (check all that apply)

Telephone (no real time video)

Telehealth video platform-ZOOM

Telehealth video platform-Amwell

Other telehealth video platform

Telephone (no real time video) sometimes, telehealth video platform other times.

5. How would you describe your experience using telephone only in providing care?

Excellent

Good

Fair

Poor

Very poor

N/A - I have not used telephone only

6. How would you describe your experience using telehealth real-time two-way video in providing care?

Excellent

Good

Fair

Poor

Very poor

N/A - I have not used telehealth two-way video

7. What were some of the challenges you experienced? (check all that apply)

I do not feel as connected/comfortable as I do in person

I do not feel that my patient is engaged

I am concerned that I may miss relevant information (for example, a side effect of a treatment)

I prefer the clinic/hospital, as the setting is important

I am concerned about confidentiality

I have had technical problems establishing/maintaining the connection

I have difficulty using technology / apps

Patient has difficulty using technology / apps

Other

8. What were some of the positive things you experienced? (check all that apply)

Patient seemed more engaged/comfortable

Flexible scheduling/rescheduling

Timely start (no commute, intake delays)

Lack/reduction of no shows

Other

9. Which diagnoses are most appropriate for telehealth treatment? (Check all that apply)

Psychotic disorders

Affective disorders

Anxiety disorders

OCD

PTSD

Personality Disorders

ADHD

Substance use - Alcohol

Substance use - Cocaine

Substance use - Opioids

Substance use - Sedatives

Substance use - Cannabis

Other

10. Which diagnoses are least appropriate for telehealth treatment? (Check all that apply)

Psychotic disorders

Affective disorders

Anxiety disorders

OCD

PTSD

Personality Disorders

ADHD

Substance use - Alcohol

Substance use - Cocaine

Substance use - Opioids

Substance use - Sedatives

Substance use - Cannabis

Other

11. After the current outbreak is over, I would like to continue using telehealth in:

<25% of patients

25-50% of patients

50-75% of patients

>75% of patients

12. Future use of telehealth will be mostly determined by the following (check all that apply)

- Patient's age
- Patient's diagnosis
- Patient's severity of symptoms
- Patient's phase of treatment (new vs. known patient)
- Patient's goal/type of therapy (groups vs. individual, etc)
- Patient's location (suburbs, rural, long commute, etc)
- Patient's history of no-show for in person appointments
- Patient's preference/request
- My preference (flexible scheduling, etc)
- Other

13. Is there anything else you would like to tell us?

Thank you for completing the survey.

**Table.** Characteristics of the providers included in the survey

|                                                    | Total | Percentage (%) |
|----------------------------------------------------|-------|----------------|
| <b>Age Range</b>                                   |       |                |
| <25                                                | 22    | 3              |
| 25-34                                              | 254   | 31             |
| 35-44                                              | 216   | 27             |
| 45-54                                              | 137   | 17             |
| 55-64                                              | 129   | 16             |
| 65-74                                              | 48    | 6              |
| >74                                                | 4     | 1              |
| Total responders                                   | 810   | 100            |
| <b>Profession/Role</b>                             |       |                |
| Social Worker                                      | 247   | 31             |
| Licensed Patient Counselor/Mental Health Counselor | 106   | 13             |
| Psychologist/Therapist                             | 88    | 11             |
| Care Coordinator/Case Manager                      | 84    | 11             |
| Psychiatrist                                       | 77    | 10             |
| Recovery Coach/Peer Counselor                      | 73    | 9              |
| Nurse/NP                                           | 49    | 6              |
| Physician (other than psychiatrist)                | 26    | 3              |
| Administrative Personnel                           | 20    | 3              |
| Resident/Fellow                                    | 17    | 2              |
| Research Coordinator                               | 6     | 1              |
| Other                                              | 10    | 1              |
| Total responders                                   | 803   | 100            |
| <b>Area of professional activity</b>               |       |                |
| Adult Outpatient Clinic                            | 458   | 56             |
| Child and Adolescent Clinic                        | 148   | 18             |
| Community Outreach                                 | 111   | 14             |
| Drug Use Treatment Program                         | 98    | 12             |
| Adult Crisis Center/Partial Hospital               | 50    | 6              |
| Early Treatment Program                            | 31    | 4              |
| Geriatric Clinic                                   | 23    | 3              |
| Injection Clinic                                   | 13    | 2              |
| Inpatient                                          | 11    | 1              |
| Research                                           | 10    | 1              |
| Other                                              | 16    | 2              |
| Total responders                                   | 819   | 100            |

**Table** Percentages are calculated in relation to the number of respondents. More than one area of professional activity could be selected. Responses are listed in the order of most frequently answered items, except for age which is listed in chronological order.

Figure.

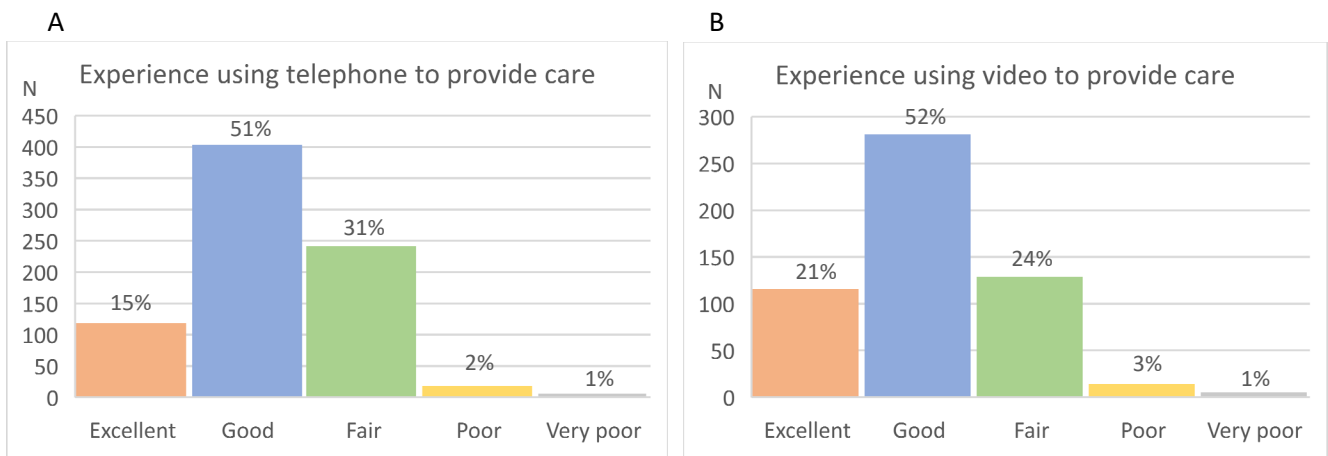

**Figure. A.** Healthcare providers experience about providing mental healthcare via telephone rated on a 5-point Likert scale ranging from 0=Very Poor to 5= Excellent. **B.** Healthcare providers experience about providing mental healthcare via video conferencing rated on a 5-point Likert scale ranging from 0=Very Poor to 5= Excellent.

**Table.** Reported most appropriate and least appropriate diagnosis for the use of telepsychiatry

|                                                                  | Number of responders who endorsed | Percentage of responders who endorsed |
|------------------------------------------------------------------|-----------------------------------|---------------------------------------|
| <b>Most appropriate diagnosis for the use of telepsychiatry</b>  |                                   |                                       |
| Anxiety disorders                                                | 638                               | 96                                    |
| Mood disorders                                                   | 421                               | 63                                    |
| Post-Traumatic Stress Disorder                                   | 375                               | 56                                    |
| Obsessive Compulsive Disorder                                    | 310                               | 47                                    |
| Personality disorders                                            | 287                               | 43                                    |
| Attention Deficit and Hyperactivity Disorder                     | 265                               | 40                                    |
| Substance use - Alcohol                                          | 257                               | 39                                    |
| Substance use - Cannabis                                         | 250                               | 38                                    |
| Substance use - Cocaine/Stimulants                               | 215                               | 32                                    |
| Substance use - Opioids                                          | 210                               | 32                                    |
| Substance use - Sedatives                                        | 194                               | 29                                    |
| Psychotic disorders                                              | 158                               | 24                                    |
| Other                                                            | 8                                 | 1                                     |
| Total respondents                                                | 667                               | 100                                   |
| <b>Least appropriate diagnosis for the use of telepsychiatry</b> |                                   |                                       |
| Psychotic disorders                                              | 438                               | 67                                    |
| Substance use - Opioids                                          | 208                               | 32                                    |
| Substance use - Sedatives                                        | 191                               | 29                                    |
| Substance use - Cocaine                                          | 190                               | 29                                    |
| Personality Disorders                                            | 188                               | 29                                    |
| Substance use - Alcohol                                          | 187                               | 29                                    |
| Attention Deficit and Hyperactivity Disorder                     | 156                               | 24                                    |
| Substance use - Cannabis                                         | 143                               | 22                                    |
| Post-Traumatic Stress Disorder                                   | 108                               | 17                                    |
| Mood disorders                                                   | 86                                | 13                                    |
| Obsessive Compulsive Disorder                                    | 81                                | 12                                    |
| Anxiety disorders                                                | 38                                | 6                                     |
| Other                                                            | 21                                | 3                                     |
| Total respondents                                                | 652                               | 100                                   |

**Table.** Percentages of responders who endorsed are calculated in relation to the number of respondents. More than one diagnosis could be selected. Responses are listed in the order of most frequently answered items.

**Table.** Determinants of future use of telepsychiatry

|                                                              | Number of responders who endorsed | Percentage of responders who endorsed |
|--------------------------------------------------------------|-----------------------------------|---------------------------------------|
| <b>Determinants of future use of telepsychiatry</b>          |                                   |                                       |
| Patient's preference/request                                 | 553                               | 69                                    |
| Patient's severity of symptoms                               | 500                               | 62                                    |
| Patient's phase of treatment (new vs. known patient)         | 441                               | 55                                    |
| Patient's location (suburbs, rural, long commute, etc.)      | 432                               | 54                                    |
| Patient's history of no-show for in person appointments      | 408                               | 51                                    |
| Patient's diagnosis                                          | 344                               | 43                                    |
| My preference (flexible scheduling, etc.)                    | 286                               | 36                                    |
| Patient's goal/type of therapy (groups vs. individual, etc.) | 275                               | 34                                    |
| Patient's age                                                | 233                               | 29                                    |
| Total respondents                                            | 804                               | 100                                   |

**Table.** Percentages of responders who endorsed are calculated in relation to the number of respondents. More than one determinant of use could be selected. Responses are listed in the order of most frequently answered items.
